# Supplementary material for: Data-Driven Analysis of Antimicrobial Resistance in Foodborne Pathogens from Six States within the US
Source: PubMed Central journal article supplement (PMC6572035; doi:10.3390/ijerph16101811), 2019-05-22
Supplement: ijerph-16-01811-s001.pdf [file ijerph-16-01811-s001.pdf]

**Table S1.** Genes with most resistance to antimicrobials and hierarchical clustering.

| States | Antimicrobial-resistance genes                                                                                                                                                                                                                                                                                                                |
|--------|-----------------------------------------------------------------------------------------------------------------------------------------------------------------------------------------------------------------------------------------------------------------------------------------------------------------------------------------------|
| PA     | <i>aadA</i> , <i>aph(3'')</i> , <i>aph(3'')-Ib</i> , <i>aph(6)-I</i> , <i>aph(6)-Id</i> , <i>bla</i> , <i>blaCMY</i> , <i>sul2</i> , <i>tet</i> , and <i>tet(A)</i>                                                                                                                                                                           |
| NY     | <i>aadA</i> , <i>aph(3'')</i> , <i>aph(3'')-Ib</i> , <i>aph(3')</i> , <i>aph(3')-Ia</i> , <i>aph(6)-I</i> , <i>aph(6)-Id</i> , <i>blaCMY</i> , <i>blaCMY-2</i> , <i>blaTEM</i> , <i>blaTEM-1</i> , <i>bla</i> , <i>sul2</i> , <i>tet</i> , and <i>tet(A)</i>                                                                                  |
| MD     | <i>aadA</i> , <i>aph(3'')</i> , <i>aph(3'')-Ib</i> , <i>aph(6)-I</i> , <i>aph(6)-Id</i> , <i>blaCMY</i> , <i>sul2</i> , <i>tet</i> , and <i>tet(A)</i>                                                                                                                                                                                        |
| NM     | <i>aadA</i> , <i>aph(3'')-Ib</i> , <i>aph(6)-I</i> , <i>aph(6)-Id</i> , <i>aac(3)</i> , <i>aadA1</i> , <i>aph(3')</i> , <i>aph(3')-Ia</i> , <i>blaCMY</i> , and <i>blaCMY-2</i> , <i>blaTEM</i> , <i>blaTEM-1</i> , <i>fos</i> , <i>fosA</i> , <i>qac</i> , <i>qacEdelta1</i> , <i>sul1</i> , <i>sul2</i> , <i>tet(A)</i> , and <i>tet(B)</i> |
| MN     | <i>aadA</i> , <i>aadA1</i> , <i>aph(3')</i> , <i>aph(3')-I</i> , <i>aph(3'')</i> , <i>aph(3'')-Ib</i> , <i>aph(6)-I</i> , <i>aph(6)-Id</i> , <i>bla</i> , and <i>blaCMY</i> , <i>blaCMY-2</i> , <i>blaTEM</i> , <i>blaTEM-1</i> , <i>fosA</i> , <i>sul2</i> , <i>tet</i> , <i>tet(A)</i> , and <i>tet(B)</i>                                  |
| CA     | <i>aadA</i> , <i>aph(3'')</i> , <i>aph(3'')-Ib</i> , <i>aph(6)-I</i> , <i>aph(6)-Id</i> , <i>bla</i> , <i>fos</i> , <i>fosA</i> , and <i>oqxB</i>                                                                                                                                                                                             |

**Table S2.** Metabolic functions of the most common antimicrobial-resistance genes.

| Genes              | Metabolic Functions                                                                                                                                                                                                                                                                                                                                                                                                                                                  |
|--------------------|----------------------------------------------------------------------------------------------------------------------------------------------------------------------------------------------------------------------------------------------------------------------------------------------------------------------------------------------------------------------------------------------------------------------------------------------------------------------|
| <i>aadA</i>        | <ul style="list-style-type: none"> <li>• Aminoglycoside resistance</li> <li>• Integration of the plasmid-specific <i>aadA</i> cassette into the nuclear genome for a fraction of the resistant cell lines</li> </ul>                                                                                                                                                                                                                                                 |
| <i>aph(3')</i>     | <ul style="list-style-type: none"> <li>• Aminoglycoside resistance</li> <li>• Catalysis of the addition of phosphate from ATP to the 3'-hydroxyl group of a 4,6-disubstituted aminoglycoside</li> <li>• Origination from enzymes from the metabolic pathway for aminoglycosides and development in order to counteract the toxic effects of these antibiotics in the host bacterial cell <ul style="list-style-type: none"> <li>• Transferase</li> </ul> </li> </ul> |
| <i>aph(3')-Ia</i>  | <ul style="list-style-type: none"> <li>• Aminoglycoside resistance</li> <li>• A transposon-encoded aminoglycoside phosphotransferase</li> <li>• Conferred resistance to kanamycin and neomycin</li> </ul>                                                                                                                                                                                                                                                            |
| <i>aph(3'')</i>    | <ul style="list-style-type: none"> <li>• Aminoglycoside resistance</li> <li>• Phosphorylation of streptomycin on the hydroxyl group at position 3''</li> </ul>                                                                                                                                                                                                                                                                                                       |
| <i>aph(3'')-Ib</i> | <ul style="list-style-type: none"> <li>• Aminoglycoside resistance</li> <li>• Catalysis of ATP-dependent phosphorylation of a hydroxyl group</li> <li>• Aminoglycoside phosphotransferase encoding by plasmids, transposons, integrative conjugative elements, and chromosomes in <i>Enterobacteriaceae</i> and <i>Pseudomonas</i> spp</li> </ul>                                                                                                                    |
| <i>aph(6)-I</i>    | <ul style="list-style-type: none"> <li>• Aminoglycoside resistance</li> <li>• Catalysis of ATP-dependent phosphorylation of a hydroxyl group</li> </ul>                                                                                                                                                                                                                                                                                                              |
| <i>aph(6)-Id</i>   | <ul style="list-style-type: none"> <li>• Aminoglycoside resistance</li> <li>• Streptomycin phosphotransferase</li> <li>• Phosphotransferase activity, alcohol group as an acceptor</li> </ul>                                                                                                                                                                                                                                                                        |
| <i>bla</i>         | <ul style="list-style-type: none"> <li>• Hydrolysis of the beta-lactam bond in susceptible beta-lactam antibiotics, thus conferring resistance to penicillin and cephalosporin</li> </ul>                                                                                                                                                                                                                                                                            |

|                                                |                                                                                                                                                                                                                                                                                                                                              |
|------------------------------------------------|----------------------------------------------------------------------------------------------------------------------------------------------------------------------------------------------------------------------------------------------------------------------------------------------------------------------------------------------|
|                                                | <ul style="list-style-type: none"> <li>• Beta-lactamase</li> </ul>                                                                                                                                                                                                                                                                           |
| <i>bla</i> CMY                                 | <ul style="list-style-type: none"> <li>• Hydrolysis of the beta-lactam bond in susceptible beta-lactam antibiotics <ul style="list-style-type: none"> <li>• ampC-related <i>bla</i> gene</li> </ul> </li> </ul>                                                                                                                              |
| <i>bla</i> CMY-2                               | <ul style="list-style-type: none"> <li>• Hydrolysis of beta-lactam bond <ul style="list-style-type: none"> <li>• Beta-lactamase</li> </ul> </li> </ul>                                                                                                                                                                                       |
| <i>bla</i> TEM,<br><i>bla</i> TEM-1            | <ul style="list-style-type: none"> <li>• Hydrolysis of beta-lactam bond</li> <li>• Responsibility of amino acid substitutions for the extended-spectrum beta lactamase (ESBL) phenotype cluster around the active site of the enzyme and change its configuration, allowing access to oxyimino-beta-lactam substrates.</li> </ul>            |
| <i>tet</i> , <i>tet</i> (A),<br><i>tet</i> (B) | <ul style="list-style-type: none"> <li>• Tetracycline-resistant protein <ul style="list-style-type: none"> <li>• Active tetracycline efflux</li> </ul> </li> <li>• Decrease of the accumulation of the antibiotic in whole cells <ul style="list-style-type: none"> <li>• Metal-tetracycline/H<sup>+</sup> antiporter</li> </ul> </li> </ul> |
| <i>fos</i> , <i>fos</i> (A)                    | <ul style="list-style-type: none"> <li>• Fosfomycin-resistant genes</li> <li>• Inactivation of fosfomycin by addition of a glutathione residue</li> </ul>                                                                                                                                                                                    |
| <i>oqx</i> B                                   | <ul style="list-style-type: none"> <li>• Efflux pump membrane transporter</li> <li>• Component of RND-type multidrug efflux pump that confers resistance to olaquinox</li> </ul>                                                                                                                                                             |
| <i>sul</i> 2                                   | <ul style="list-style-type: none"> <li>• Dihydropteroate synthase activity <ul style="list-style-type: none"> <li>• High-affinity sulfate permease</li> </ul> </li> <li>• Sulfate transmembrane transporter activity</li> </ul>                                                                                                              |
